# Supplementary material
Source: MDPI journal article supplement (https://www.mdpi.com/2410-3888/7/3/130)
Supplement: s1 [file s1]

**Table S1.** The XCR1 sequence identities between grass carp and other species.

| Species                         | Protein                      | GenBank Accession Number | Identity |
|---------------------------------|------------------------------|--------------------------|----------|
| <i>Ctenopharyngodon idellus</i> | chemokine C motif receptor   | AHK09953                 |          |
| <i>Lepisosteus oculatus</i>     | chemokine XC receptor 1-like | XP_006634615             | 53%      |
| <i>Astyanax mexicanus</i>       | chemokine XC receptor 1-like | XP_007242656             | 63%      |
| <i>Haplochromis burtoni</i>     | chemokine XC receptor 1-like | XP_005951465             | 49%      |
| <i>Danio rerio</i>              | chemokine XC receptor 1-like | XP_002667429             | 77%      |
| <i>Oreochromis niloticus</i>    | chemokine XC receptor 1-like | XP_005476551             | 49%      |
| <i>Microtus ochrogaster</i>     | chemokine XC receptor 1      | XP_005348228             | 44%      |
| <i>Lipotes vexillifer</i>       | chemokine XC receptor 1      | XP_007470304             | 46%      |
| <i>Bos taurus</i>               | chemokine XC receptor 1      | NP_001181894             | 45%      |
| <i>Erinaceus europaeus</i>      | chemokine XC receptor 1      | XP_007531515             | 47%      |
| <i>Felis catus</i>              | chemokine XC receptor 1      | XP_006928739             | 44%      |
